# Supplementary material for: Factors affecting performance and functional stratification of membrane-aerated biofilms with a counter-diffusion configuration
Source: Royal Society of Chemistry journal article supplement (doi:10.1039/c9ra03128f), 2019-01-01
Supplement: c9ra03128f1.pdf [file c9ra03128f1.pdf]

**Factors affecting performance and functional stratification of  
membrane-aerated biofilm with a counter-diffusion configuration**

4 Tinggang Li<sup>a,\*</sup>, Junxin Liu<sup>b</sup>

5 <sup>a</sup> Institute of Process Engineering, Chinese Academy of Sciences, Beijing 100190,  
6 People's Republic of China

7 <sup>b</sup>Research Center for Eco-Environmental Sciences, Chinese Academy of Sciences,  
8 Beijing 100085, People's Republic of China

10 \* Corresponding author for Tinggang Li: +86-10-62849133, Fax: +86-10-62849133, E-  
11 mail: tgli@ipe.ac.cn

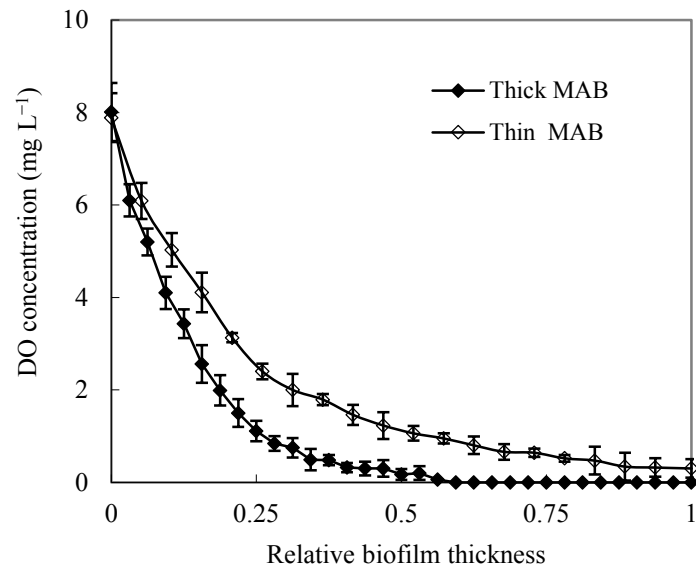

15

16 Fig. S1. Dissolved oxygen concentration profiles in MABs. (♦), thick Biofilm; (◇), Thin  
 17 biofilm. Relative biofilm thickness is defined as the fraction of a thin biofilm of 950  $\mu\text{m}$   
 18 (at SLR1) or a thick biofilm of 1600  $\mu\text{m}$  (at SLR2). Biofilm thickness was calculated  
 19 from membrane surface to biofilm–liquid interface.
